# Supplementary material for: Improved thin film morphology and bulk-heterojunction solar cell performance through systematic tuning of the surface energy of conjugated polymers
Source: Royal Society of Chemistry journal article supplement (doi:10.1039/c2jm15517f), 2012-01-01
Supplement: c2jm15517f.pdf [file c2jm15517f.pdf]

5

# Supporting Information for Improved Thin Film Morphology and Bulk-Heterojunction Solar Cell Performance through Systematic Tuning the Surface Energy of Conjugated Polymers

Ying Sun, Shang-Chieh Chien, Hin-Lap Yip, Kung-Shih Chen, Yong Zhang, Joshua A. Davies, Fang-Chung Chen, Baoping Lin<sup>\*</sup>, and Alex K.-Y. Jen<sup>\*</sup>

10

15

20

25

30

35

40

45

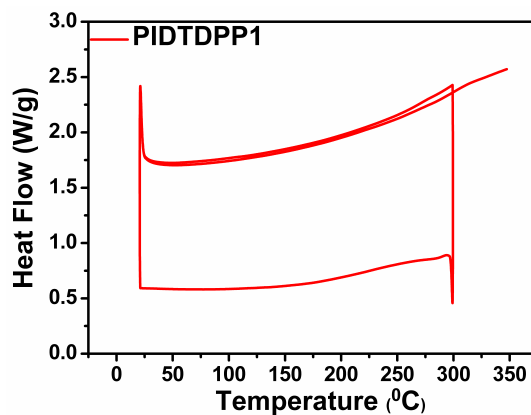

5

Figure S1.DSC thermogram of PIDTDPP1 with a scanning rate of 10 °C/min.

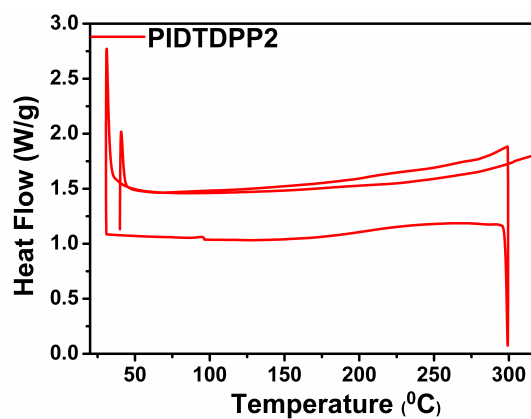

Figure S2.DSC thermogram of PIDTDPP2 with a scanning rate of 10 °C/min.

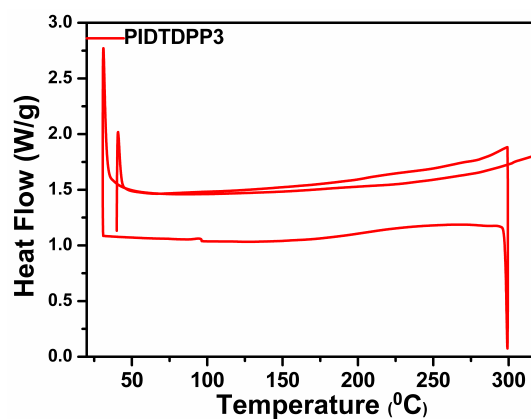

10

Figure S3.DSC thermogram of PIDTDPP3 with a scanning rate of 10 °C/min.

| polymer             | $\theta_{\text{water}}$<br>(°) | $\theta_2$<br>(°) | $\gamma^d$<br>[mN/m] | $\gamma^p$<br>[mN/m] | $\gamma^{\text{tot}}$<br>[mN/m] |
|---------------------|--------------------------------|-------------------|----------------------|----------------------|---------------------------------|
| PIDTDPP1            | 97.4                           | 51.4              | 25.8                 | 4.4                  | 30.2                            |
| PIDTDPP2            | 93.5                           | 47.4              | 26.0                 | 5.9                  | 31.9                            |
| PIDTDPP3            | 90.8                           | 36.1              | 29.0                 | 5.8                  | 34.8                            |
| PC <sub>71</sub> BM | 90.1                           | 54.0              | 27.3                 | 7.0                  | 34.3                            |

**Table S1.** Measured contact angle values of various polymers and PC<sub>71</sub>BM films and the corresponding surface energy calculated using Wu model (harmonic mean). ( $\theta_2$  was measured using dimethyl sulfoxide (DMSO) for polymers and ethylene glycol (MEG) for PC<sub>71</sub>BM, respectively)

5

### Methods for the calculation of surface energy:<sup>1</sup>

The surface energy was calculated from the measured contact angles using the following Wu model (harmonic mean) formula:

$$\gamma_{\text{water}}(1+\cos)\theta_{\text{water}} = \frac{4\gamma_{\text{water}}^d\gamma^d}{\gamma_{\text{water}}^d+\gamma^d} + \frac{4\gamma_{\text{water}}^p\gamma^p}{\gamma_{\text{water}}^p+\gamma^p}$$

$$\gamma_2(1+\cos)\theta_2 = \frac{4\gamma_2^d\gamma^d}{\gamma_2^d+\gamma^d} + \frac{4\gamma_2^p\gamma^p}{\gamma_2^p+\gamma^p}$$

$$\gamma^{\text{tot}} = \gamma^d + \gamma^p$$

10

$\gamma^p$ : polar component;  $\gamma^d$ : dispersive component

15 1. X. Bulliard, S.-G. Ihn, S. Yun, Y. Kim, D. Choi, J.-Y. Choi, M. Kim, M. Sim, J.-H. Park, W. Choi and K. Cho, *Adv. Funct. Mater.*, 2010, 20, 4381.
